# Supplementary material for: Hypoglycemic and lipid lowering effects of theaflavins in high-fat diet-induced obese mice
Source: Royal Society of Chemistry journal article supplement (doi:10.1039/d1fo01966j), 2021-01-01
Supplement: d1fo01966j1.pdf [file d1fo01966j1.pdf]

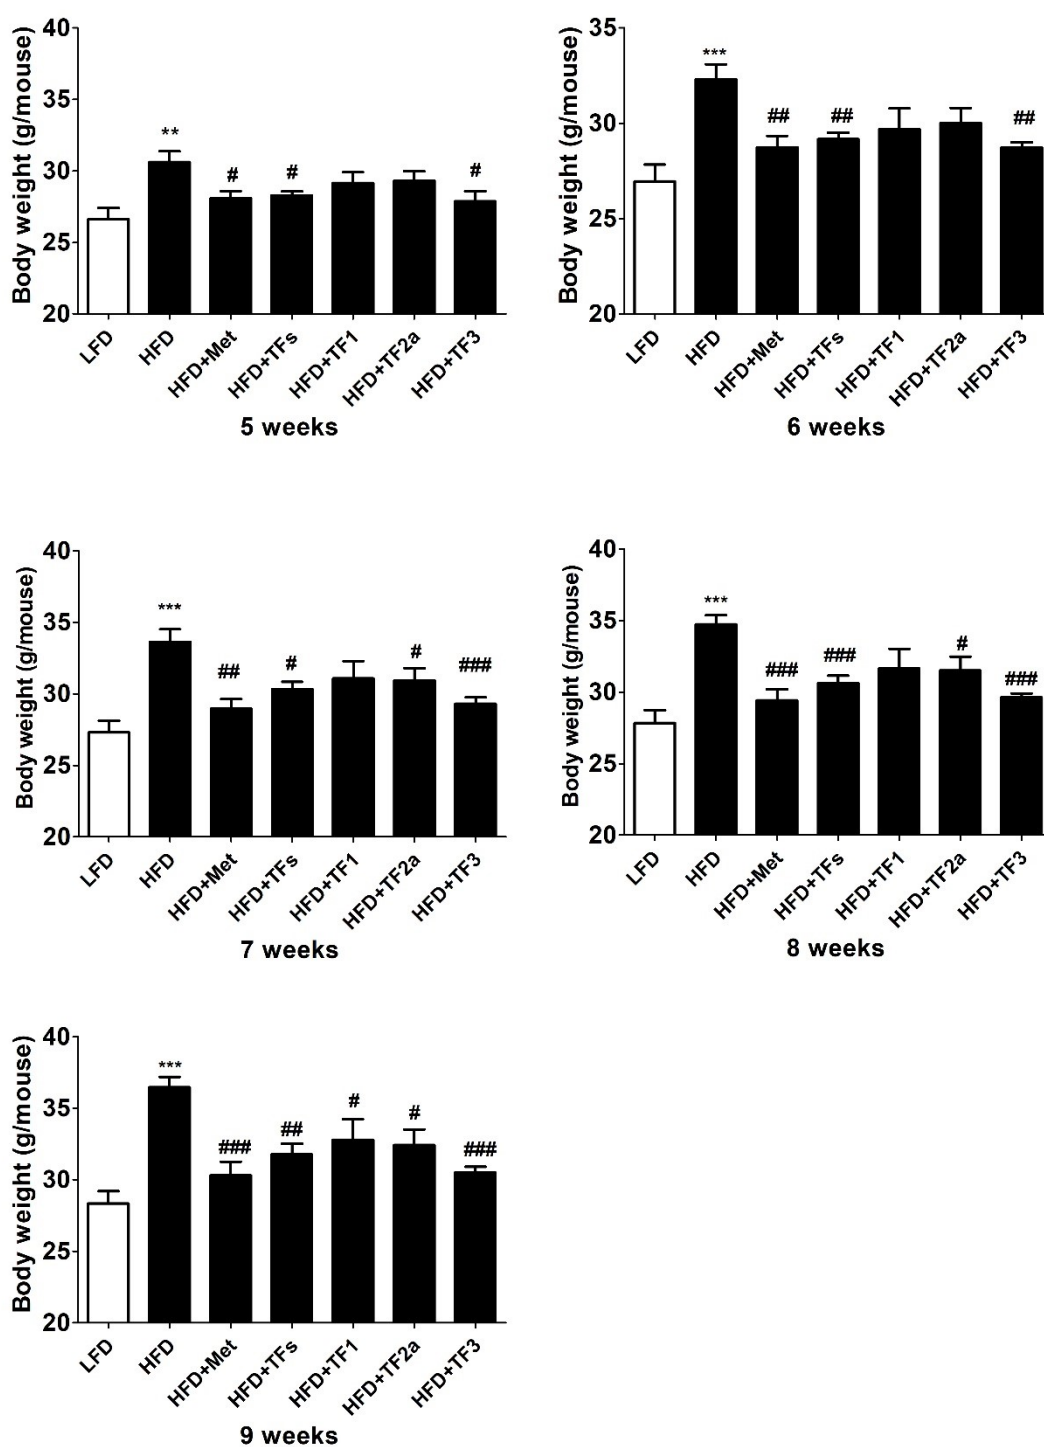

**Figure S1. The body weight of mice after 5, 6, 7, 8, 9 weeks**

Note: \*\* $p < 0.01$ ; \*\*\* $p < 0.001$  when compared with LFD group; # $p < 0.05$ ; ## $p < 0.01$ ; ### $p < 0.001$  when compared with HFD group.
