# Supplementary material for: Hypoglycemic and lipid lowering effects of theaflavins in high-fat diet-induced obese mice
Source: Royal Society of Chemistry journal article supplement (doi:10.1039/d1fo01966j), 2021-01-01
Supplement: d1fo01966j2.pdf [file d1fo01966j2.pdf]

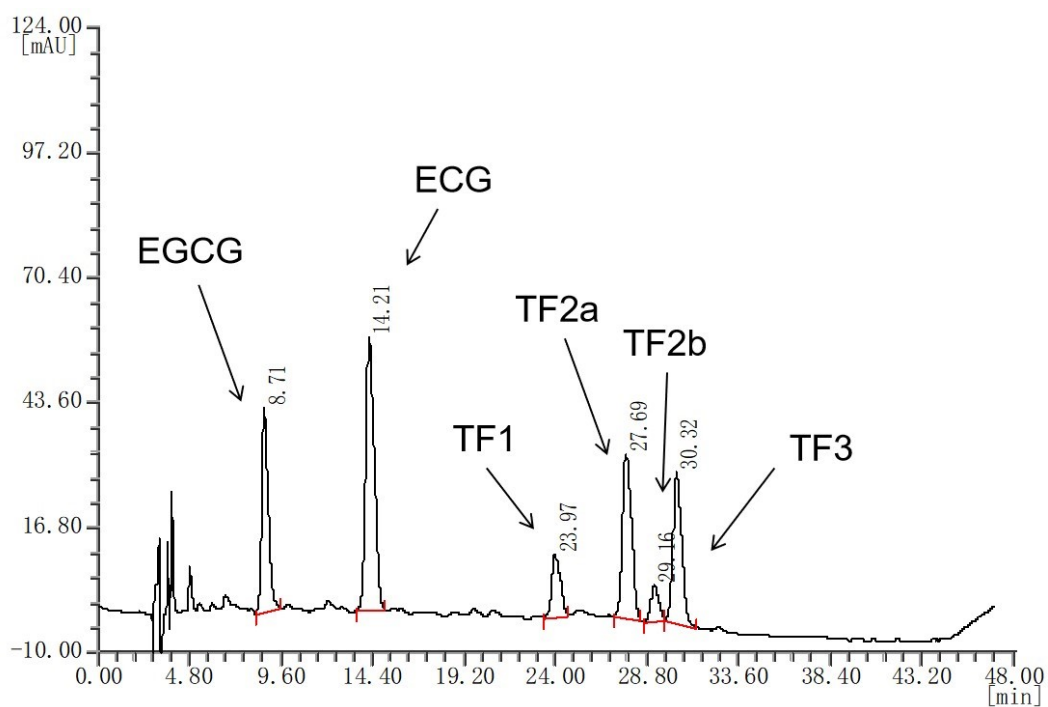

**Figure S2. The HPLC chromatogram of TFs**

Note: EGCG, epigallocatechin gallate; ECG, epicatechin gallate; TF1, theaflavin; TF2a, theaflavin-3-gallate; TF2b, theaflavine-3'-digallate; TF3, Theaflavine-3, 3'-digallate.
